# Supplementary material
Source: publisher figshare collection journal article supplement (https://frontiersin.figshare.com/ndownloader/files/35070076)
Supplement: Supplementary file 1 [file 35070076]

## Sheet: Supplementary Table 3
Supplementary Table 3. The proportion of accepted species in each kingdom and phylum compared to those observed in this review, as well as the frequency (based on presence/absence) of phyla studied per year. Proportions in red relate to underrepresented taxa in marine ecological studies that use transcriptomics. The number of accepted species for each taxa was retrieved from WoRMS on the 14th of …
Kingdom	Accepted species (WoRMS)	Proportion of accepted species	Observed species	Proportion of observed species			Actinobacteria	Annelida	Arthropoda	Ascomycota	Bacteroidetes	Basidiomycota	Bigyra	Brachiopoda	Bryozoa	Chlorophyta	Chordata	Ciliophora	Cnidaria	Cyanobacteria	Echinodermata	Foraminifera	Haptophyta	Metamonada	Mollusca	Myzozoa	Nematoda	Ochrophyta	Planctomycetes	Porifera	Proteobacteria	Rhodophyta	Tardigrada	Tenericutes	Thaumarchaeota	Tracheophyta	Frequency
Animalia	204992	85.3802	181	58.3871		2010	0	0	1	0	0	0	0	0	0	0	0	0	0	0	1	0	0	0	1	0	0	1	0	0	1	0	0	0	0	0	5
Archaea	116	0.0483146	1	0.322581		2011	0	0	1	0	0	0	0	0	0	0	0	0	1	1	0	0	1	0	1	1	0	1	0	0	1	1	0	0	0	1	10
Bacteria	2093	0.871746	46	14.8387		2012	0	0	1	0	0	0	0	0	0	0	1	0	0	0	0	0	0	0	1	1	0	1	0	0	0	1	0	0	0	0	6
Chromista	20355	8.47796	49	15.8065		2013	0	0	0	0	0	0	0	0	0	0	1	0	1	0	1	0	0	0	1	1	0	1	1	0	1	1	0	0	0	1	10
Fungi	1379	0.574361	4	1.29032		2014	0	0	1	0	0	0	1	0	0	0	1	1	1	0	1	0	1	0	1	1	0	1	0	1	1	0	0	0	0	1	13
Plantae	10406	4.33415	25	8.06452		2015	1	1	1	0	1	0	0	0	0	1	1	1	0	0	1	0	1	0	1	0	0	1	0	0	1	1	0	0	0	1	14
Protozoa	637	0.265314	1	0.322581		2016	0	0	1	0	1	0	0	1	0	1	1	0	1	1	1	0	0	0	1	1	1	1	0	1	1	0	0	0	0	0	14
Viruses	115	0.0478981	3	0.967742		2017	1	1	1	1	1	0	0	0	0	1	1	0	1	1	1	0	1	1	1	1	0	1	0	1	1	1	1	0	0	1	20
Phylum	Accepted species (WoRMS)	Proportion of accepted species	Observed species	Proportion of observed species		2018	0	0	1	0	0	0	1	0	0	1	1	1	1	1	1	1	1	0	1	1	1	1	0	0	1	0	0	0	1	1	17
Mollusca	50119	22.7311	51	16.7213		2019	0	0	1	1	1	0	0	0	0	0	1	0	1	0	1	0	1	0	1	1	1	1	0	1	1	0	0	1	0	1	15
Chordata	24106	10.9331	45	14.7541		2020	1	1	1	1	0	1	1	0	1	1	1	1	1	1	1	0	1	0	1	1	0	1	0	1	1	1	0	0	0	1	21
Arthropoda	57696	26.1676	44	14.4262
Cnidaria	12009	5.4466	12	3.93443
Echinodermata	7500	3.40158	11	3.60656
Porifera	9226	4.18439	6	1.96721
Annelida	13460	6.1047	3	0.983607
Nematoda	6446	2.92354	3	0.983607
Brachiopoda	414	0.187767	1	0.327869
Bryozoa	6427	2.91492	1	0.327869
Tardigrada	216	0.0979654	4	1.31148
Thaumarchaeota	3	0.00136063	1	0.327869
Proteobacteria	811	0.367824	30	9.83607
Cyanobacteria	771	0.349682	6	1.96721
Bacteroidetes	238	0.107943	4	1.31148
Actinobacteria	83	0.0376441	3	0.983607
Planctomycetes	5	0.00226772	1	0.327869
Ochrophyta	4333	1.9652	22	7.21311
Myzozoa	3123	1.41642	14	4.59016
Haptophyta	370	0.167811	5	1.63934
Ciliophora	2663	1.20779	4	1.31148
Bigyra	74	0.0335622	3	0.983607
Foraminifera	8918	4.0447	1	0.327869
Ascomycota	1028	0.466243	3	0.983607
Basidiomycota	91	0.0412725	1	0.327869
Tracheophyta	290	0.131528	11	3.60656
Rhodophyta	7511	3.40657	7	2.29508
Chlorophyta	2540	1.152	7	2.29508
Metamonada	13	0.00589607	1	0.327869
